# Supplementary material for: Ancestral polymorphisms explain the role of chromosomal inversions in speciation
Source: PubMed Central journal article supplement (PMC6085072; doi:10.1371/journal.pgen.1007526), 2018-07-30
Supplement: pgen.1007526.s002.pdf [file pgen.1007526.s002.pdf]

DperSR/DperST

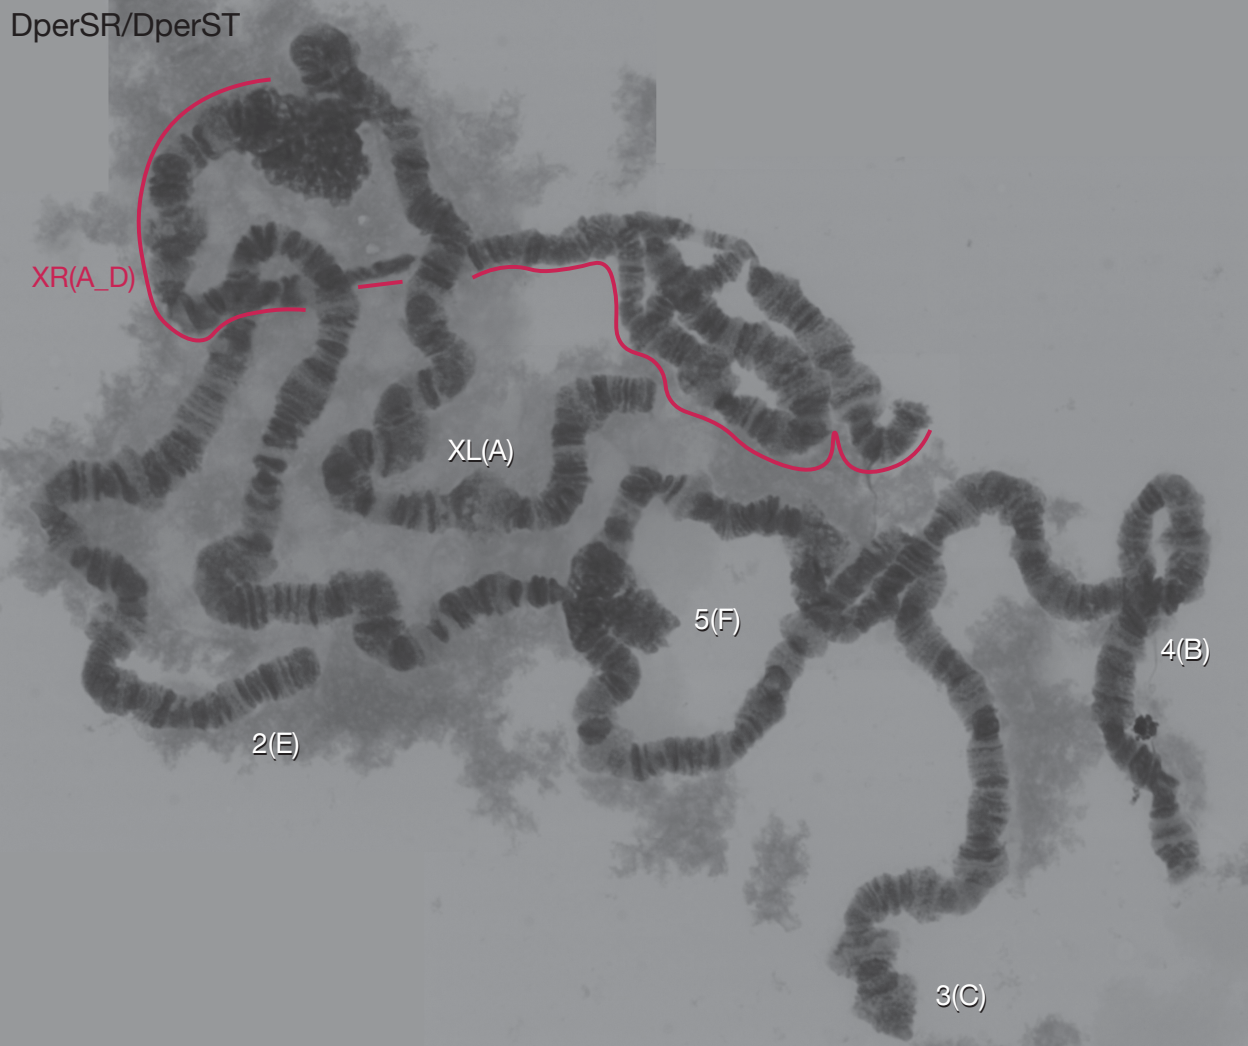

XR(A\_D)

XL(A)

5(F)

4(B)

2(E)

3(C)
