# Supplementary material for: Ancestral polymorphisms explain the role of chromosomal inversions in speciation
Source: PubMed Central journal article supplement (PMC6085072; doi:10.1371/journal.pgen.1007526), 2018-07-30

**A**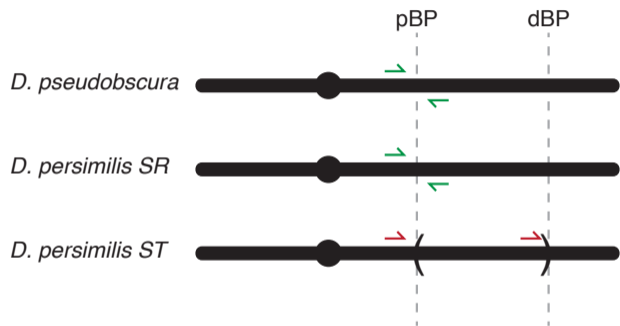**B**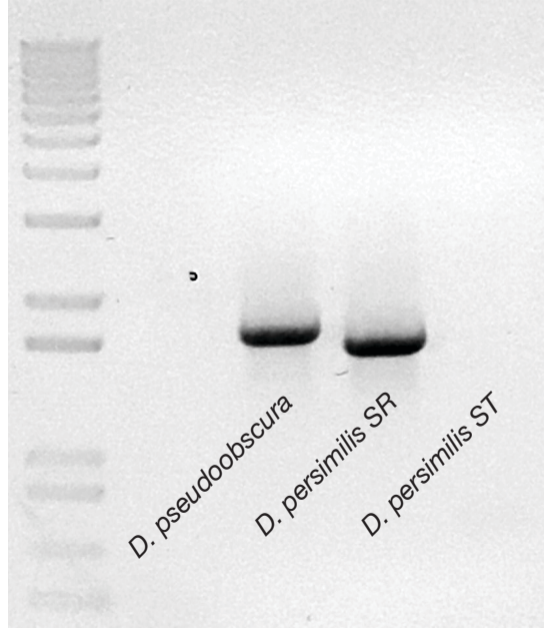

Supplement: pgen.1007526.s003.pdf [file pgen.1007526.s003.pdf]
