# Supplementary material for: Ancestral polymorphisms explain the role of chromosomal inversions in speciation
Source: PubMed Central journal article supplement (PMC6085072; doi:10.1371/journal.pgen.1007526), 2018-07-30
Supplement: pgen.1007526.s008.pdf [file pgen.1007526.s008.pdf]

**Supplemental Table 1: *D. pseudoobscura* reference alignment statistics**

| <b>Statistic</b>                                               | <b><i>D. pse ST</i></b> | <b><i>D. per ST</i></b> | <b><i>D. per SR</i></b> | <b><i>D. mir</i></b> |
|----------------------------------------------------------------|-------------------------|-------------------------|-------------------------|----------------------|
| <i>Total Reads</i>                                             | 139337556               | 242743626               | 215111160               | 49649299             |
| <i>Mapped Reads</i>                                            | 133512488               | 223244577               | 165073083               | 45556023             |
| <i>% Mapped</i>                                                | 95.82                   | 91.97                   | 76.74                   | 91.53                |
| <i>Mean Coverage</i>                                           | 82.72                   | 180.28                  | 133.37                  | 22.19                |
| <i>St. Dev. Coverage</i>                                       | 236.03                  | 666.46                  | 538.60                  | 60.15                |
| <i>% Reference Bases Covered<br/>(QUAL &gt; 30, DP &gt; 2)</i> | 96.49                   | 95.48                   | 95.45                   | 89.77                |
